# Supplementary material
Source: PubMed Central journal article supplement (PMC3424310)
Supplement: NIHMS388575-supplement-1.pdf [file NIHMS388575-supplement-1.pdf]

# Supplemental Figure 1

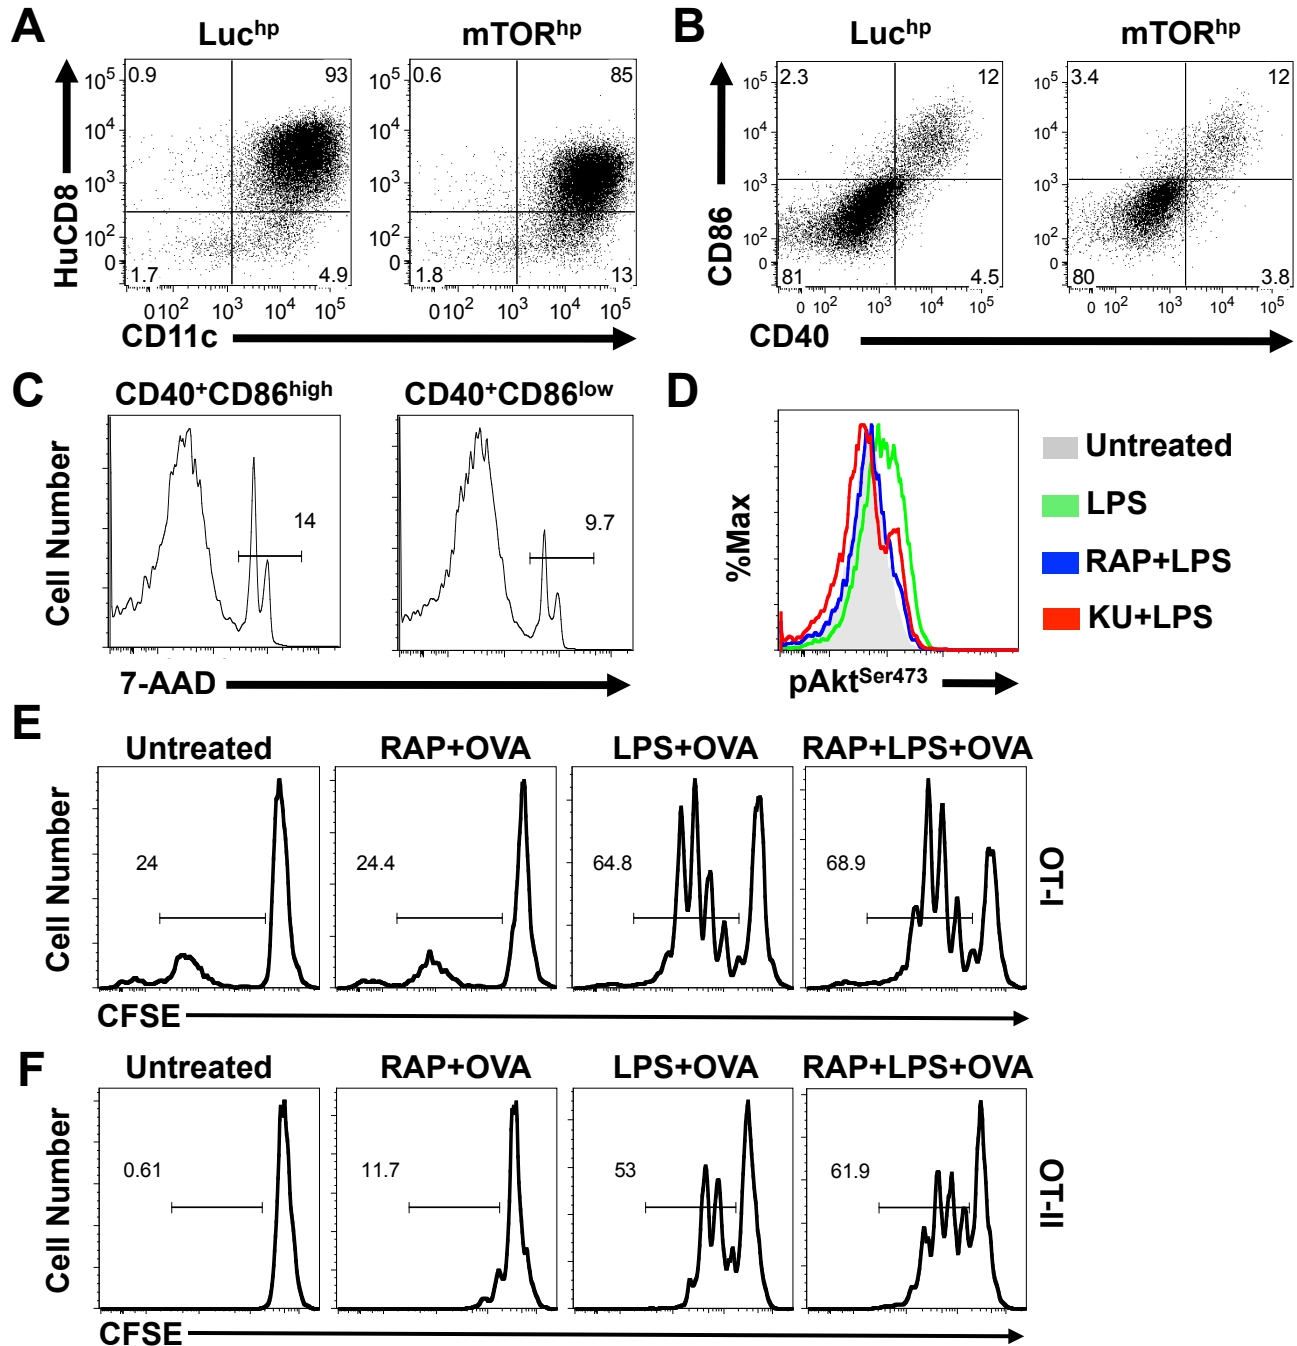

**Supplemental Figure 1.** (A) DCs were transduced with either Luc<sup>hp</sup> or mTOR<sup>hp</sup> –expressing retrovirus and purity of vector<sup>+</sup> (human CD8) CD11c<sup>+</sup> cells were assessed by flow cytometry. (B) DCs were transduced with either Luc<sup>hp</sup> or mTOR<sup>hp</sup> –expressing retrovirus. Unstimulated cells were analyzed by FACS on Day 6 of differentiation for CD40 and CD86 expression. (C) CD40<sup>+</sup>CD86<sup>high</sup> and CD40<sup>+</sup>CD86<sup>low</sup> cells from Luc<sup>hp</sup> DCs from Figure 1E were gated on and histogram of 7-AAD staining is displayed. CD40/CD86 gates were determined from total CD11c<sup>+</sup> cells. (D) DCs were treated as indicated and stained for phospho-Akt (Ser473) 24 hours later. Histograms are gated on CD11c<sup>+</sup> cells. (E and F) DCs were pulsed for 6 hours with media alone, or ovalbumin (OVA) with RAP, LPS, or RAP + LPS and then washed and incubated at a 1:5 ratio with either CFSE-labeled OT-I splenocytes (E) or CFSE-labeled MHCII-depleted OT-II splenocytes (F) for 4 days. T-cell proliferation was determined by CFSE dilution within CD8<sup>+</sup> or CD4<sup>+</sup> cells by FACS analysis.

## Supplemental Figure 2

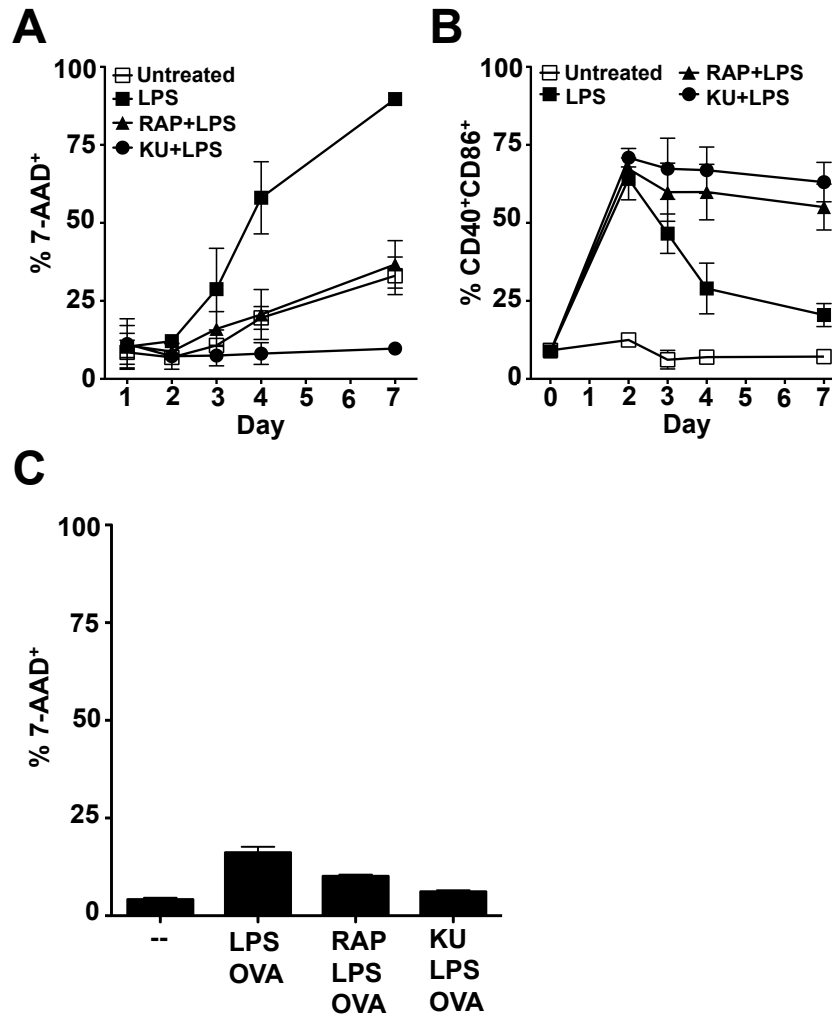

**Supplemental Figure 2.** The effects of mTOR inhibition on DC lifespan and costimulatory molecule expression in the presence of blocking anti-IL-10R. DCs were cultured in the presence of anti-IL-10R under the conditions indicated. (A) Changes in cell viability over time post activation were measured by FACS analysis of 7-AAD staining. (B) DCs were additionally analyzed daily by FACS for CD40 and CD86 expression. For all graphs, data are presented as mean  $\pm$  SD of 2 independent experiments. (C) DCs were pulsed for 24 hours with media alone, or ovalbumin (OVA) with LPS, RAP + LPS, or KU+LPS and then washed and cultured in complete media for 4 days with daily media changes. DC viability for each treatment group was assessed at day 4 after stimulation by 7-AAD staining using FACS analysis.

## Supplemental Figure 3

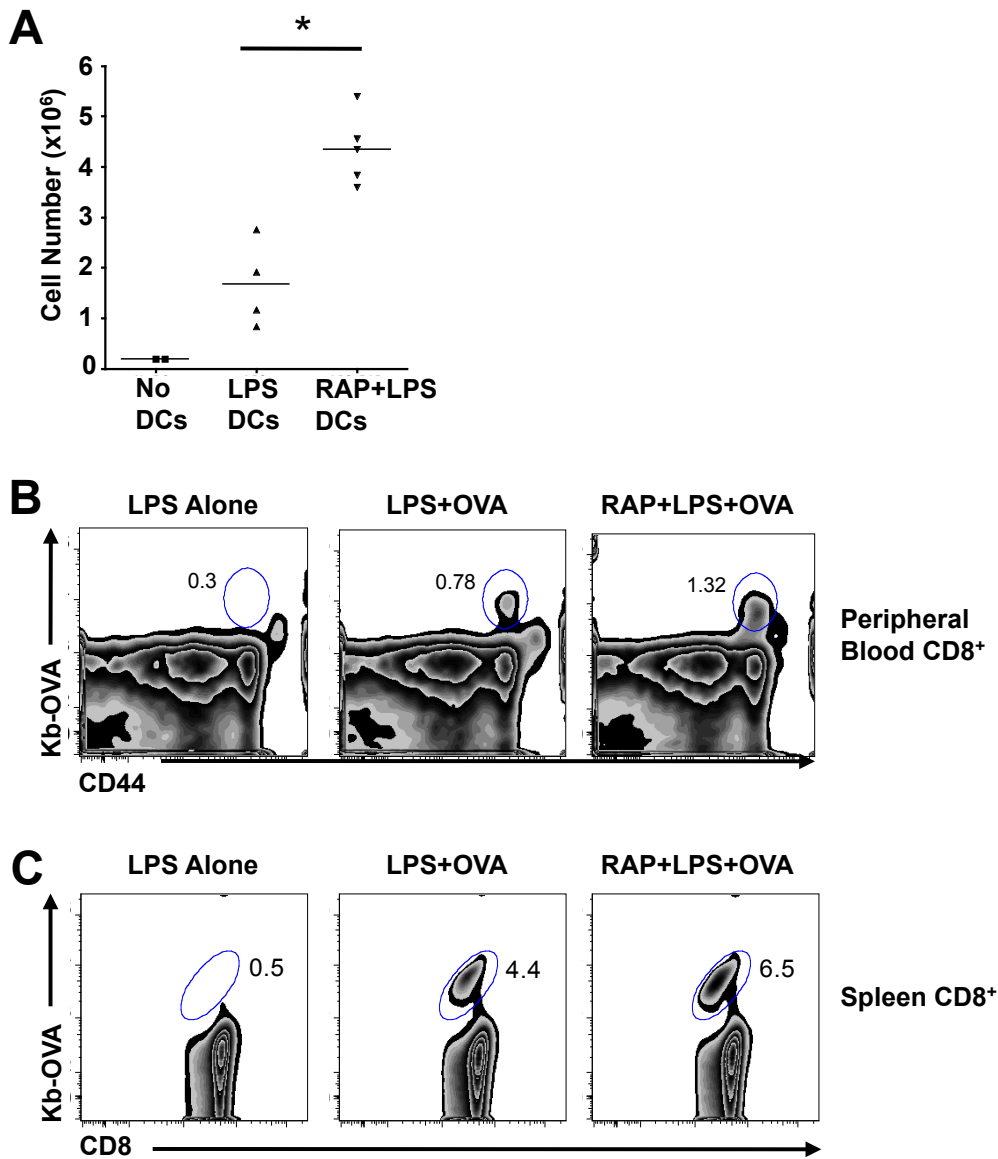

**Supplemental Figure 3.** DCs activated in the presence of rapamycin induce larger immune responses *in vivo* following autologous DC transfer. (A)  $5 \times 10^5$  DCs pulsed with either LPS+OVA or RAP+LPS+OVA for 6 hours were transferred into the footpads of mice. 7 days later, popliteal LNs were harvested and the total number of LN cells was quantified as compared to naïve popliteal LNs. Asterisk (\*) indicates statistically significant difference ( $p < 0.05$ ) in total cell numbers in the draining LNs between LPS DCs and RAP+LPS DCs groups. (B and C) Mice were treated as in (A) and the frequency of CD8<sup>+</sup>Kb-OVA Tetramer<sup>+</sup> cells were quantified in the peripheral blood (B) and the spleen (C). FACS plots represented concatenated data from 5-10 individual mice.

## Supplemental Figure 4

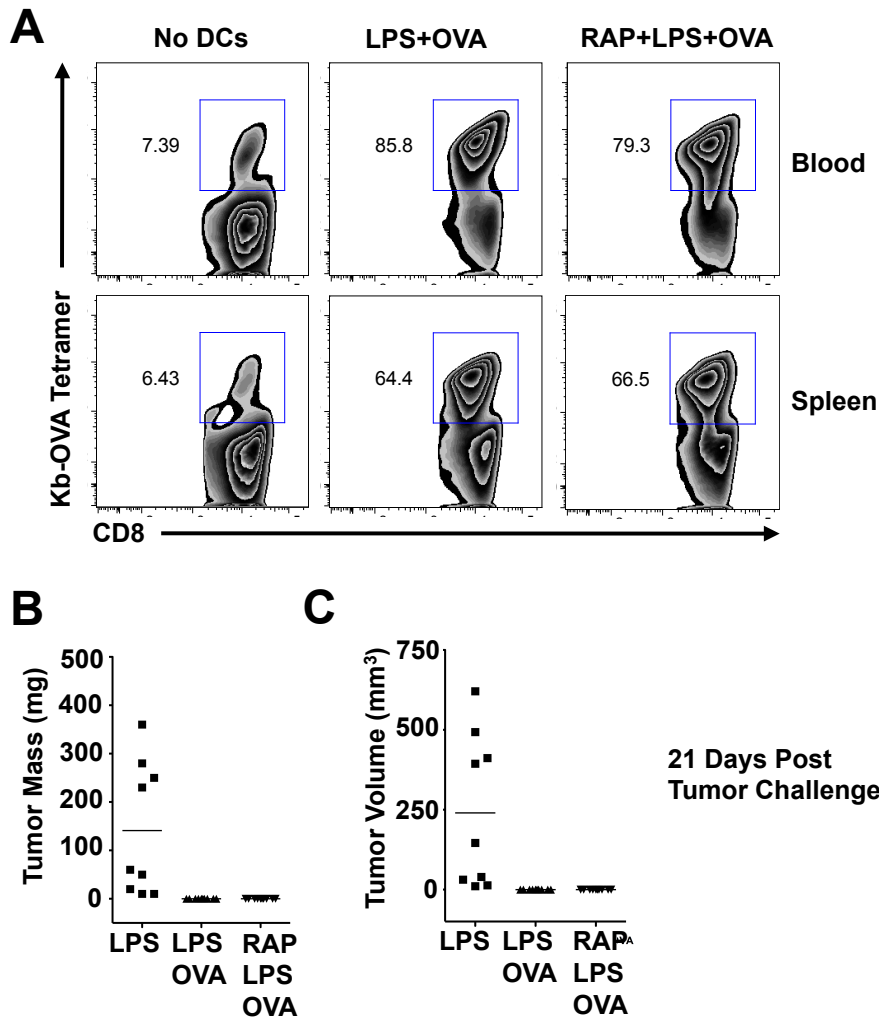

**Supplemental Figure 4.** Rapamycin-treated DCs are competent at generating CD8<sup>+</sup> T-cell memory responses *in vivo*. (A) Cohorts of mice received either no DCs, or  $5 \times 10^5$  DCs pulsed with LPS+OVA or RAP+LPS+OVA for 6 hours in the left footpads. 35 days later, mice were challenged with  $1 \times 10^6$  CFU Ova-expressing *L. monocytogenes* intravenously. Five days after bacterial challenge, mice were sacrificed and the frequency of Kb-OVA tetramer<sup>+</sup> T-cells (CD8<sup>+</sup> gate) were determined. Data represent concatenated data from 4 individual mice per group. (B and C)  $5 \times 10^5$  DCs were pulsed with LPS alone, LPS+OVA, or RAP+LPS+OVA for 6 hours and then injected subcutaneously into cohorts of mice ( $n = 9$ ). 28 days later, mice were challenged with  $1 \times 10^5$  Ova-expressing B16 melanoma cells intradermally and monitored for tumor growth. 21 days following tumor challenge mice were sacrificed and tumor mass (B) and volume (C) were recorded.
